# Supplementary material for: Cardiac troponin detection in one drop of saliva or urine for 10-minute assessment of acute myocardial infarction
Source: Royal Society of Chemistry journal article supplement (doi:10.1039/d5mh00525f), 2025-01-01
Supplement: d5mh00525f1.pdf [file d5mh00525f1.pdf]

# 1 Supporting Information

## 2 **Cardiac troponin detection in one drop of saliva or urine for 10** 3 **minutes assessment of acute myocardial infarction**

4 Xuelian Wu<sup>1,a</sup>, Zewei Lian<sup>2,a</sup>, Zhiyu Tan<sup>2,a</sup>, Yaqun Yu<sup>3</sup>, Tong Ren<sup>3</sup>, Hua Shen<sup>3</sup>, Jie  
5 Zhang<sup>3</sup>, Shengli Jiang<sup>3</sup>, Yundai Chen<sup>4,\*</sup>, Meng Su<sup>2,\*</sup>, Nan Cheng<sup>3,\*</sup>

6  
7 1 Department of Cardiovascular Surgery, First Medical Center of PLA General  
8 Hospital, Beijing, 100853, P. R. China.

9 2 Key Laboratory of Green Printing, CAS Research/Education Center for Excellence  
10 in Molecular Sciences, Beijing Engineering Research Center of Nanomaterials for  
11 Green Printing Technology, Beijing National Laboratory for Molecular Sciences  
12 (BNLMS), Institute of Chemistry, Chinese Academy of Sciences (ICCAS), Beijing  
13 100190, P. R. China.

14 3 Department of Cardiovascular Surgery, Sixth Medical Center of PLA General  
15 Hospital, Beijing, 100048, P. R. China.

16 4 Senior Department of Cardiology, Sixth Medical Center of PLA General Hospital,  
17 Beijing, 100037, P. R. China.

18 \* Correspondence author.

19 E-mail addresses: cn86919@163.com (N. Cheng), sumeng1988@iccas.ac.cn (M. Su),  
20 cyundai@vip.163.com (Y. Chen).

### 21 **<sup>a</sup> These authors contributed equally to this work. Contents**

|    |                                                                                                  |
|----|--------------------------------------------------------------------------------------------------|
| 22 |                                                                                                  |
| 23 | 1. Reflectance spectra of PC290 at 0 angles of incidence.....2                                   |
| 24 | 2. The height of the photonic crystal was measured using a step meter .....2                     |
| 25 | 3. Scanning electron microscope image of the PCB after sintering .....2                          |
| 26 | 4. Fluorescence images of PC290 and blank substrate were performed using Cy5-dAb.....3           |
| 27 | 5. Fluorescence intensity analysis of PC290 and blank substrate was performed using Cy5-dAb....3 |
| 28 | 6. Standard curve of fluorescence intensity on biochip versus CTnT concentration in human urine3 |
| 29 | 7. Biochip quantification of CTnT concentrations in serum, saliva and urine.....4                |
| 30 | 8. Quantification of CTnT using a portable test instrument carrying PC290 biochip.....4          |
| 31 |                                                                                                  |

32 **1. Reflectance spectra of PC290 at 0 angles of incidence**

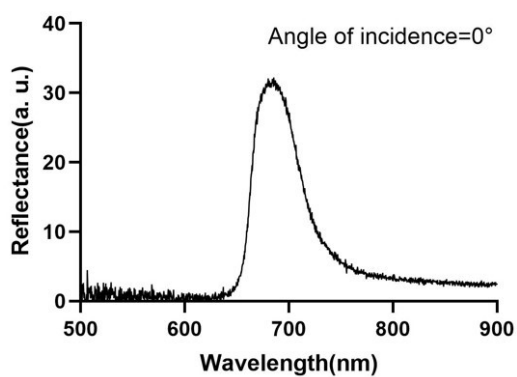

33

34 *Figure S1.* Reflectance spectra of PC290 at 0 angles of incidence

35 **2. The height of the photonic crystal was measured using a step meter**

36

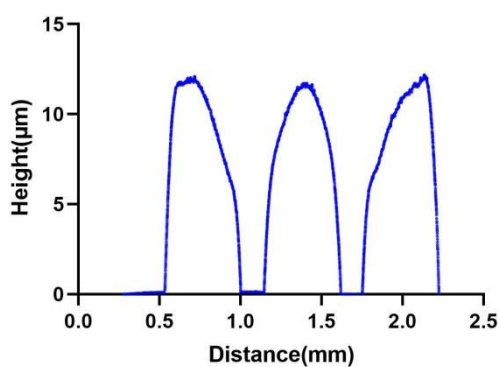

37

38 *Figure S2.* The height of the photonic crystal was measured using a step meter

39 **3. Scanning electron microscope image of the PCB after sintering**

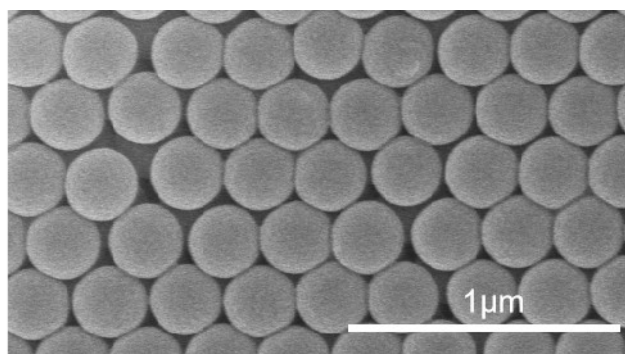

40

41 *Figure S3.* Scanning electron microscope image of the PCB after sintering

42 **4. Fluorescence images of PC290 and blank substrate were performed using Cy5-dAb**

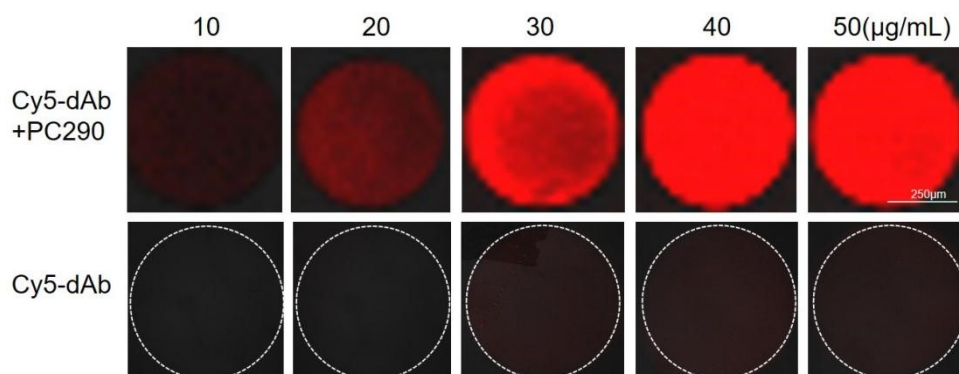

43

44 **Figure S4.** Fluorescence images of PC290 and blank substrate were performed using Cy5-dAb

45 **5. Fluorescence intensity analysis of PC290 and blank substrate was performed using Cy5-**  
 46 **dAb**

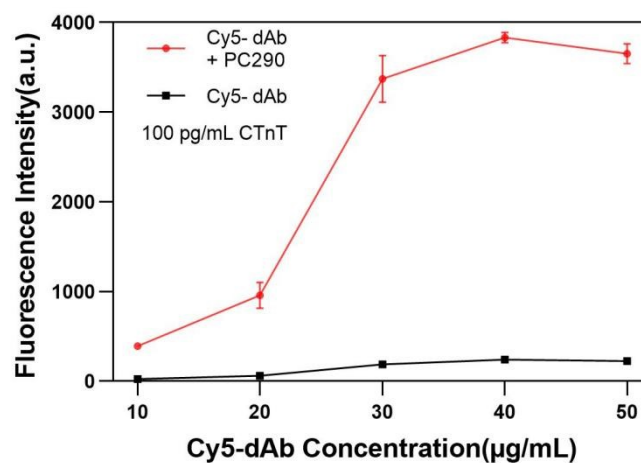

47

48 **Figure S5.** Fluorescence intensity analysis of PC290 and blank substrate was performed using Cy5-dAb

49 **6. Standard curve of fluorescence intensity on biochip versus CTnT concentration in human**  
 50 **urine.**

51

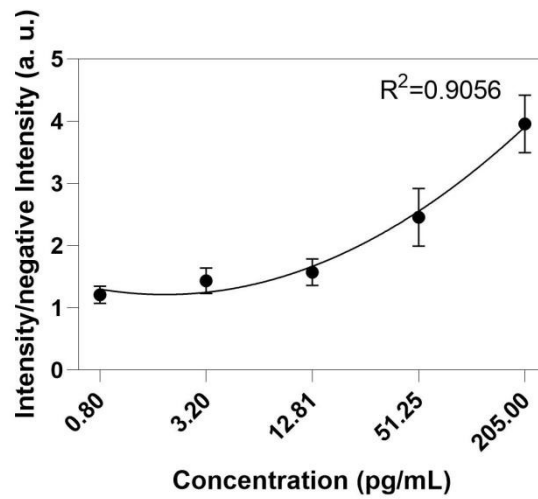

52

53 **Figure S6.** Standard curve of fluorescence intensity on biochip versus CTnT concentration in human urine. Data

54

are mean  $\pm$  standard deviation, n = 10 replicates.

## 55 7. Biochip quantification of CTnT concentrations in serum, saliva and urine

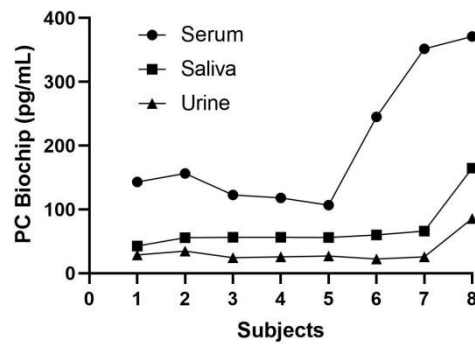

56

57 **Figure S7.** Biochip quantification of CTnT concentrations in serum, saliva and urine

## 58 8. Quantification of CTnT using a portable test instrument carrying PC290 biochip

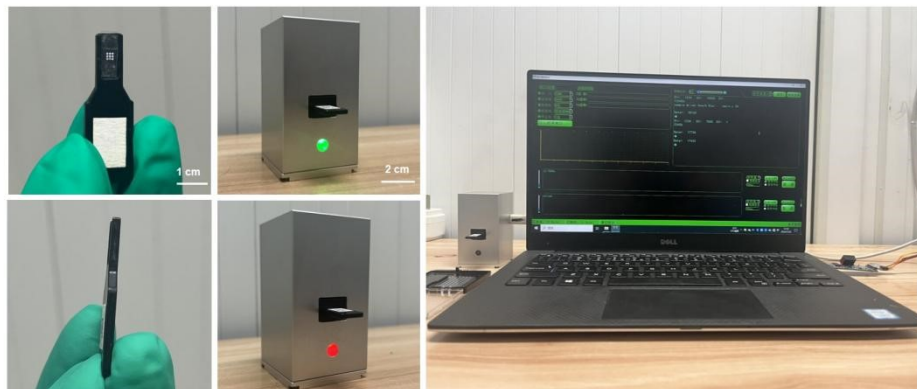

59

60

**Figure S8.** Quantification of CTnT using a portable test instrument carrying PC290 biochip

61
